# Supplementary material for: REL-1017 (Esmethadone) Increases Circulating BDNF Levels in Healthy Subjects of a Phase 1 Clinical Study
Source: PubMed Central journal article supplement (PMC8113752; doi:10.3389/fphar.2021.671859), 2021-04-28
Supplement: Table1.pdf [file Table1.pdf]

**Supplementary Table 1: REL-1017 AUC<sub>0-10</sub> and difference between pretreatment and day 10 BDNF levels.**

| <b>Subject</b>     | <b>REL-1017 AUC<br/>ng · d/ml</b> | <b>Δ BDNF (day 10-day1)</b> |
|--------------------|-----------------------------------|-----------------------------|
| REL-1017 Subject 1 | 2533                              | 2.861                       |
| REL-1017 Subject 2 | 1625                              | 10.085                      |
| REL-1017 Subject 3 | 1343                              | 2.447                       |
| REL-1017 Subject 4 | 1537                              | 3.887                       |
| REL-1017 Subject 5 | 1924                              | 4.962                       |
| REL-1017 Subject 6 | 774                               | 1.811                       |
| Placebo Subject 1  | 0                                 | -0.074                      |
| Placebo Subject 2  | 0                                 | 0.035                       |
